# Supplementary material
Source: publisher figshare collection journal article supplement (https://acs.figshare.com/ndownloader/files/26493130)
Supplement: Supplementary file 1 [file 26493130]

## Fast photo-chrono-amperometry of photosynthetic complexes for biosensors and electron transport studies

Manuel López-Ortiz<sup>1,2</sup>, Ricardo A. Zamora<sup>1,2</sup>, Vikas Remesh<sup>3</sup>, Chen Hu<sup>4</sup>, Roberta Croce<sup>4</sup>, Niek van Hulst<sup>3,5</sup>, Pau Gorostiza<sup>1,2,5,\*</sup>

1. IBEC - Institute for Bioengineering of Catalonia, the Barcelona Institute for Science and Technology. Baldri Reixac 15-21, Barcelona 08028

2. CIBER-bbn - Network Biomedical Research Center in Biomaterials, Bioengineering and Nanomedicine.

3. ICFO - The Institute of Photonic Sciences, The Barcelona Institute of Science and Technology, 08860 Castelldefels (Barcelona), Spain.

4. Department of Physics and Astronomy and Institute for Lasers, Life and Biophotonics, Faculty of Sciences, Vrije Universiteit Amsterdam, De Boelelaan 1081, 1081 HV Amsterdam, The Netherlands.

5. ICREA - Catalan Institution for Research and Advanced Studies, 08020 Barcelona Spain

(\*) Correspondence to [pau@icrea.cat](mailto:pau@icrea.cat)

### 1. Kinetic Model

The model describes the concentration of the reaction kinetics of the involved species, namely PSI redox cofactors: chlorophyll special pair P700-P700<sup>+</sup>, iron sulfur cluster F<sub>B</sub>-F<sub>B</sub><sup>-</sup> and the paraquat analyte/redox mediator PQ<sup>+</sup>-PQ<sup>2+</sup>. The reactions, with rate k<sub>x</sub>, are described below:

k<sub>exc</sub>, photo-excitation rate of P700-F<sub>B</sub> couple:

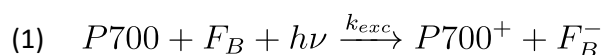

k<sub>reco</sub>, recombination rate of P700<sup>+</sup>-F<sub>B</sub><sup>-</sup> couple:

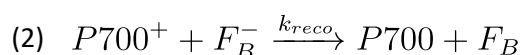

k<sub>FB-PQ2+</sub>, reduction rate of PQ<sup>2+</sup> by F<sub>B</sub><sup>-</sup>:

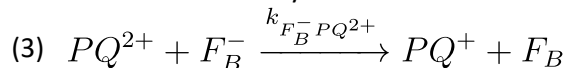

k<sub>ePSI</sub>, electron transfer rate between electrode and P700<sup>+</sup>:

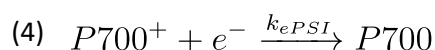

k<sub>PQ2+PQ+</sub>, PQ reduction rate at the electrode:

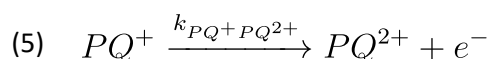

k<sub>PQ+PQ2+</sub>, PQ oxidation rate at the electrode:

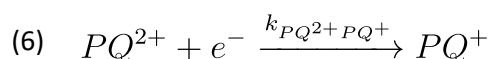

For the last two rates (PQ electron transfer rate with the electrode) the dependence with the applied potential has been modeled empirically using sigmoidal functions (equations 7-8), where  $k_{PQ}$  is an effective rate;  $V$  is the applied voltage w.r.t. Ag electrode;  $V_{PQ}$  is the measured redox mid-point  $V_{PQ} \sim -650$  mV/Ag; and  $\alpha, \beta$ , are two fitting parameters with 1/V units.

$$(7) \quad k_{PQ+PQ^{2+}} = \frac{k_{PQ}}{1 + e^{\alpha(V-V_{PQ})}}$$

$$(8) \quad k_{PQ+PQ^{2+}} = \frac{k_{PQ}}{1 + e^{-\beta(V-V_{PQ})}}$$

The kinetic equations describe the rate of change in the concentrations of the species due to reactions (1-6):

$$(9) \quad \frac{d([P700])}{dt} = -k_{exc}[P700][F_B] + k_{reco}[P700^+][F_B^-] + k_{ePSI}[P700^+]$$

$$(10) \quad \frac{d([Fb])}{dt} = -k_{exc}[P700][F_B] + k_{reco}[P700^+][F_B^-] + k_{F_B^-PQ^{2+}}[F_B^-][MV^+]$$

$$(11) \quad \frac{d([P700^+])}{dt} = +k_{exc}[P700][F_B] - k_{reco}[P700^+][F_B^-] - k_{ePSI}[P700^+]$$

$$(12) \quad \frac{d([F_B^-])}{dt} = -\frac{d([F_B])}{dt}$$

$$(13) \quad \frac{d([PQ^{2+}])}{dt} = -k_{PQ^{2+}PQ^+}[PQ^{2+}] + k_{PQ+PQ^{2+}}[PQ^+] - k_{F_B^-PQ^{2+}}[F_B^-][PQ^{2+}]$$

$$(14) \quad \frac{d([PQ^+])}{dt} = -\frac{d([PQ^{2+}])}{dt}$$

In the absence of diffusion, the current flowing through the electrode is due to the charge exchange of the electrode with the redox species described by reactions (equations 4-6). To compute current density  $j$  the rates of charges flowing from (positive sign, equation 4 and 6) and to (negative sign, equation 5) are summed (equation 15) where  $e$  denotes electron charge,  $V$  cell volume, and  $S$  the electrode surface.

$$(15) \quad j = \frac{eV}{S} ([k_{PQ^{2+}PQ^+}[PQ^{2+}] + k_{ePSI}[P700^+] - k_{PQ+PQ^{2+}}[PQ^+])$$

The differential equation system (7-14) is solved numerically using MATLAB® ode23tb solver, an implicit Runge-Kutta algorithm suitable for stiff problems. All the reaction rates and  $\alpha, \beta$  parameters are fit to minimize the square error between modeled and experimental current density with a non-linear least square algorithm (trust region reflective).
